# Supplementary material for: Flexynesis: A deep learning toolkit for bulk multi-omics data integration for precision oncology and beyond
Source: Nat Commun. 2025 Sep 12;16:8261. doi: 10.1038/s41467-025-63688-5 (PMC12432156; doi:10.1038/s41467-025-63688-5)
Supplement: Supplementary file 8 — Supplementary Data 5 [file 41467_2025_63688_MOESM8_ESM.xlsx]

## Sheet: SupplementaryTable_Fig8A
target

## Sheet: SupplementaryTable_Fig8B
target_variable
