# Supplementary material for: Flexynesis: A deep learning toolkit for bulk multi-omics data integration for precision oncology and beyond
Source: Nat Commun. 2025 Sep 12;16:8261. doi: 10.1038/s41467-025-63688-5 (PMC12432156; doi:10.1038/s41467-025-63688-5)
Supplement: Supplementary file 12 — Source Data [file 41467_2025_63688_MOESM12_ESM.xlsx]

## Sheet: Figure2a
X

## Sheet: Figure2b_ROC
X

## Sheet: Figure2b_tsne
X

## Sheet: Figure2c
X

## Sheet: Figure3a
X

## Sheet: Figure3b
X

## Sheet: Figure3c
X

## Sheet: Figure4a
X

## Sheet: Figure4b
X

## Sheet: Figure5a
X

[truncated: 11 more sheets: Figure5b, Figure5c, Figure6b, Figure7, Figure8a, Figure8b, Figure9a, Figure9b, Figure9c, Figure9d, Figure9e]
